# Supplementary material for: Lightning NO 2 simulation over the Contiguous US and its effects on satellite NO 2 retrievals
Source: Copernicus journal article supplement (doi:10.5194/acp-2019-216), 2019-04-09
Supplement: Supplementary file 1 [file acp-2019-216-supplement.pdf]

# Supplement to “Lightning NO<sub>2</sub> simulation over the Contiguous US and its effects on satellite NO<sub>2</sub> retrievals”

Qindan Zhu, Joshua L. Laughner and Ronald C. Cohen

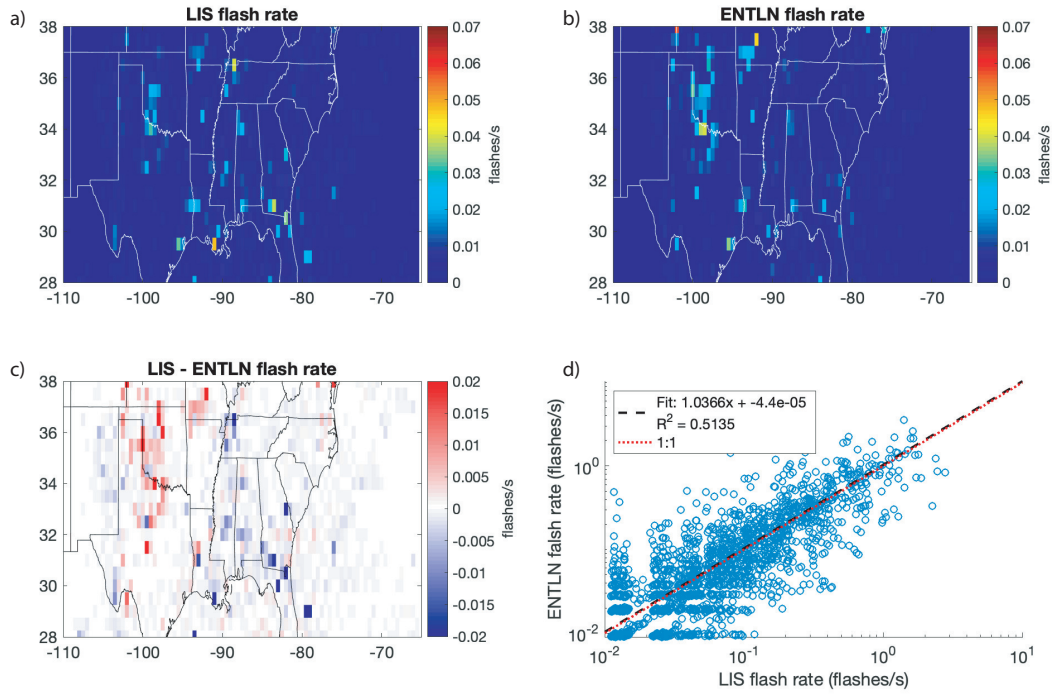

Figure S1: Comparison between flash rates observed by ENTNLN and Lightning Imaging Sensor (LIS). **(a,b)** shows the spatial pattern of lightning flash rates averaged from May 13 to Jun 23 2012 measured by LIS **(a)** and ENTNLN **(b)**. The plot region covers 20°N - 38°N and 110°W - 65°W. **(c,d)** are corresponding absolute difference and scatter plots between LIS and ENTNLN.

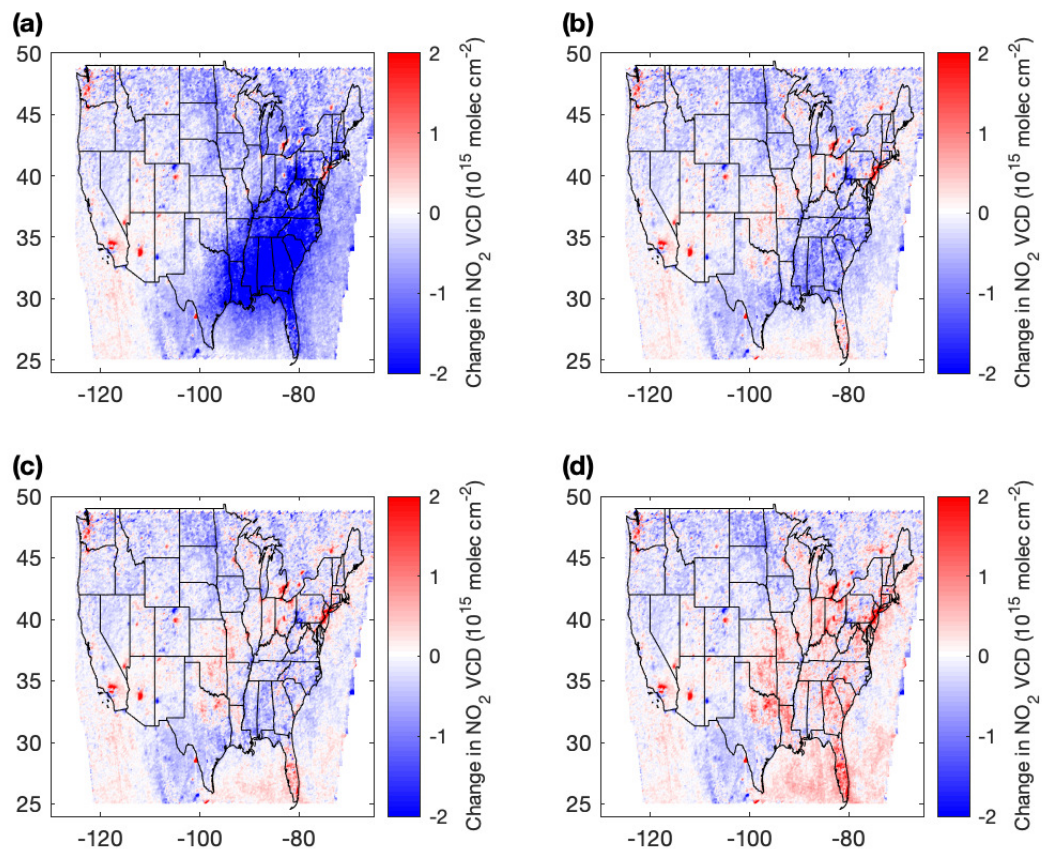

Figure S2: Difference in  $\text{NO}_2$  VCD between BEHR retrievals and WRF-Chem **(a)** without  $\text{LNO}_x$  and with  $\text{LNO}_x$  production rate of **(b)**  $400 \text{ mol NO flash}^{-1}$ , **(c)**  $500 \text{ mol NO flash}^{-1}$  and **(d)**  $665 \text{ mol NO flash}^{-1}$ .

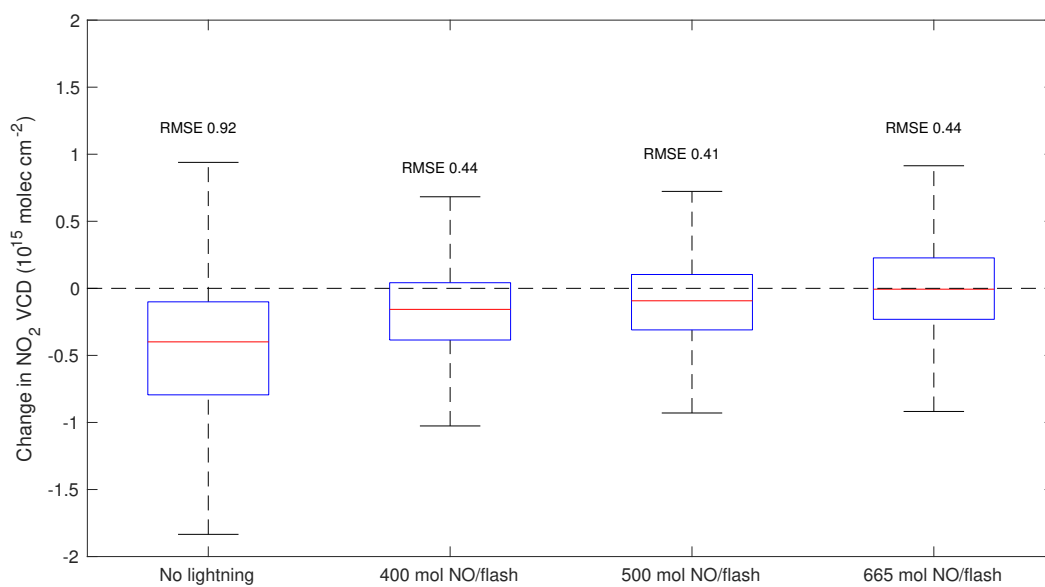

Figure S3: Box plot of difference in  $\text{NO}_2$  VCD between BEHR retrievals and WRF-Chem with varied  $\text{LNO}_x$  production rate of 0, 400, 500 and 665 mol NO flash $^{-1}$ . The corresponding root-mean-square errors (RMSE) are shown above.

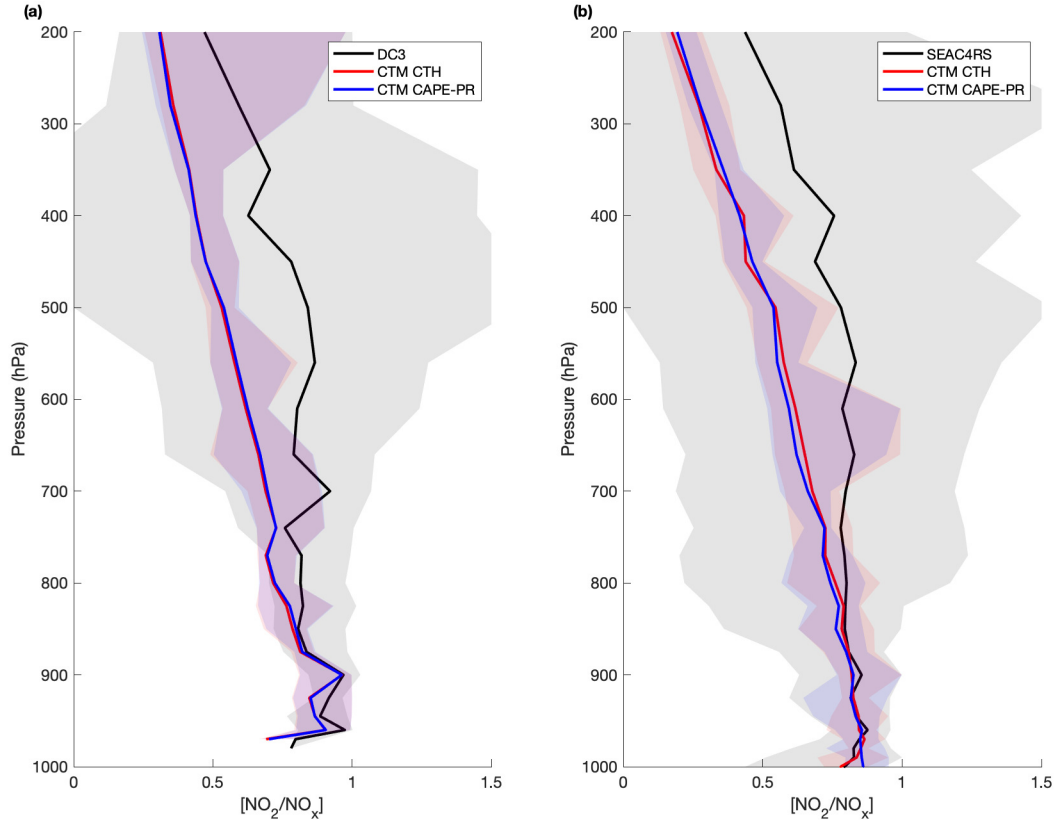

Figure S4: Comparison of WRF-Chem and aircraft  $[\text{NO}_2/\text{NO}_x]$  profiles from the **(a)** DC3, **(b)** SEAC4RS campaigns. The solid line is the median of all profiles and the shaded areas are between 10th and 90th percentiles for each binned level. Aircraft measurements are shown in black, WRF-Chem using CTH lightning parameterization in red and WRF-Chem using CAPE-PR lightning parameterization in blue.
